# Supplementary material
Source: PubMed Central journal article supplement (PMC2544566)
Supplement: 0801030105_0801030105SI.pdf [file 0801030105_0801030105SI.pdf]

# Supporting Information

Willcox et al. 10.1073/pnas.0801030105

Table S1. Baseline characteristics of the HHP/HAAS cohort in 1991–1993 ( $n = 3,741$ )

| Variables at baseline exam (1991–1993) | Mean $\pm$ SD      | Min-Max     |
|----------------------------------------|--------------------|-------------|
| Biological characteristics             |                    |             |
| Age, years                             | 77.88 $\pm$ 4.69   | 71–93       |
| Body mass index, kg/m <sup>2</sup>     | 23.43 $\pm$ 3.16   | 12.25–39.34 |
| Waist/Hip Ratio                        | 0.94 $\pm$ 0.06    | 0.73–1.27   |
| Total Cholesterol, mg/dl*              | 189.73 $\pm$ 33.16 | 81–382      |
| Triglyceride level, mg/dl*             | 148.96 $\pm$ 93.85 | 32–1369     |
| HDL, mg/dl*                            | 50.94 $\pm$ 13.36  | 20–129      |
| Glucose, mg/dl*                        | 113.03 $\pm$ 29.4  | 44–399      |
| Insulin, mIU/liter*                    | 16.82 $\pm$ 32.48  | 1.5–1164    |
| General health status                  |                    |             |
| Self-reported "poor" health, %         | 32.88              | —           |
| Disease prevalence                     |                    |             |
| CHD, %                                 | 19.38              | —           |
| Stroke, %                              | 4.73               | —           |
| Cancer, %                              | 13.84              | —           |
| Diabetes, %                            | 58.11              | —           |
| Physical and cognitive function        |                    |             |
| Lower body (difficulty walking), %     | 20.47              | —           |
| Upper body (grip strength), kg         | 30.09 $\pm$ 6.88   | 0–55        |
| Cognitive score (CASI)                 | 82.24 $\pm$ 16.37  | 0–100       |

CASI, cognitive abilities screening instrument; IU, international units.

\*Fasting values.

**Table S2. Candidate genes for human longevity and their minor allele frequencies**

| Gene name                    | Synonym                                       | Symbol | Location    | Position       | SNP ID     | MAF*  |
|------------------------------|-----------------------------------------------|--------|-------------|----------------|------------|-------|
| Adipo, C1Q, CDC <sup>†</sup> | AMAGT1 <sup>‡</sup> ; APM1                    | ADIPOQ | 3q27        | 3'-UTR         | rs1063539  | 0.216 |
|                              |                                               |        |             | intron 1       | rs182052   | 0.466 |
|                              |                                               |        |             | 5' intergenic  | rs266729   | 0.307 |
| Forkhead Box O1A             | Forkhead in RDMSM <sup>§</sup> ; FKHR         | FOXO1A | 13q14.1     | intron 2       | rs2755209  | 0.341 |
|                              |                                               |        |             | intron 2       | rs2721069  | 0.352 |
|                              |                                               |        |             | intron 2       | rs2755213  | 0.375 |
| Forkhead Box O3A             | Forkhead in RDMSM <sup>§</sup> -Like 1; FKHL1 | FOXO3A | 6q21        | intron 1       | rs2764264  | 0.205 |
|                              |                                               |        |             | intron 1       | rs13217795 | 0.201 |
|                              |                                               |        |             | intron 1       | rs2802292  | 0.239 |
| Sirtuin 1                    | <i>S. cerevisiae</i> , homolog-like 1, SIR2   | SIRT1  | 10q21.3     | intron 4       | rs1885472  | 0.159 |
|                              |                                               |        |             | intron 4       | rs7069102  | 0.159 |
|                              |                                               |        |             | intron 7       | rs10823112 | 0.364 |
| Coenzyme Q7                  | <i>C. elegans</i> homolog of CLK1             | COQ7   | 16p13.1-p12 | 3'-UTR         | rs8051232  | 0.080 |
|                              |                                               |        |             | M103T (exon 3) | rs11074359 | 0.102 |
|                              |                                               |        |             | intron 1       | rs7192898  | 0.102 |

\*MAF, Minor allele frequency from HapMap Japanese population data or JSNP.

<sup>†</sup>Adipocyte, C1Q, and collagen domain containing.

<sup>‡</sup>Adipose most abundant gene transcript 1.

<sup>§</sup>Rhabdomyosarcoma.
